# Supplementary material
Source: publisher site journal article supplement (https://www.spandidos-publications.com/8455/downloadSupplementary)
Supplement: Supplementary file 1 [file downloadSupplementary]

Table SI. Factors included in the multivariate analysis of each article.

| First author/s, year              | Age | Age at diagnosis | BMI | Axillary lymph node status | TNM stage | Ethnicity | Alcohol use | Physical activity | Mammography | Hormone treatment | Smoking | Hypertension | (Refs.) |
|-----------------------------------|-----|------------------|-----|----------------------------|-----------|-----------|-------------|-------------------|-------------|-------------------|---------|--------------|---------|
| Sturgeon <i>et al</i> , 1995      | X   |                  |     |                            |           |           |             |                   |             |                   |         |              | (55)    |
| Ettinger <i>et al</i> , 1996      | X   |                  | X   |                            |           |           | X           |                   |             |                   | X       | X            | (41)    |
| Magnusson <i>et al</i> , 1996     |     |                  |     |                            |           |           |             |                   |             |                   |         |              | (57)    |
| Willis <i>et al</i> , 1996        | X   |                  | X   |                            |           | X         | X           |                   |             | X                 | X       |              | (56)    |
| Grodstein <i>et al</i> , 1997     | X   |                  | X   |                            |           |           |             |                   |             | X                 | X       | X            | (10)    |
| Sellers <i>et al</i> , 1997       | X   |                  | X   |                            |           |           | X           | X                 |             |                   | X       | X            | (53)    |
| Bonnier <i>et al</i> , 1998       |     |                  |     |                            |           |           |             |                   |             |                   |         |              | (54)    |
| Sourander <i>et al</i> , 1998     |     |                  |     |                            |           |           |             |                   |             |                   |         |              | (59)    |
| Jernström <i>et al</i> , 1999     |     | X                |     |                            | X         |           |             |                   |             |                   |         |              | (61)    |
| Schairer <i>et al</i> , 1999      | X   |                  |     | X                          | X         | X         |             |                   |             |                   |         |              | (42)    |
| Rossouw <i>et al</i> , 2002       |     |                  |     |                            |           |           |             |                   |             |                   |         |              | (15)    |
| Beral <i>et al</i> , 2003         | X   |                  |     |                            |           |           |             |                   |             |                   |         |              | (52)    |
| Fletcher <i>et al</i> , 2005      | X   |                  |     |                            |           |           |             |                   |             | X                 |         |              | (39)    |
| Stahlberg <i>et al</i> , 2005     | X   |                  |     |                            |           |           |             |                   |             |                   |         |              | (45)    |
| Chen <i>et al</i> , 2005          |     | X                | X   |                            | X         |           |             |                   |             | X                 |         |              | (49)    |
| Pentti <i>et al</i> , 2006        | X   |                  | X   |                            |           |           |             |                   |             |                   |         |              | (50)    |
| Schuetz <i>et al</i> , 2007       | X   |                  |     | X                          | X         |           |             |                   |             |                   |         |              | (40)    |
| Newcomb <i>et al</i> , 2008       |     |                  | X   |                            |           |           |             |                   | X           |                   | X       |              | (36)    |
| Rosenberg <i>et al</i> , 2008     |     | X                |     | X                          | X         |           |             |                   | X           | X                 |         |              | (34)    |
| Sener <i>et al</i> , 2009         |     |                  |     |                            | X         |           |             |                   |             |                   |         |              | (43)    |
| Hellmann <i>et al</i> , 2010      | X   |                  | X   |                            |           |           | X           | X                 |             | X                 |         |              | (35)    |
| Norman <i>et al</i> , 2010        | X   |                  |     |                            |           |           |             |                   |             |                   |         |              | (51)    |
| Reding <i>et al</i> , 2011        | X   |                  |     |                            | X         |           |             |                   | X           | X                 |         |              | (44)    |
| Chlebowski <i>et al</i> , 2013    | X   |                  | X   |                            |           | X         | X           | X                 |             |                   | X       |              | (46)    |
| Holm <i>et al</i> , 2014          | X   |                  |     | X                          | X         |           |             |                   |             |                   |         |              | (47)    |
| Pocobelli <i>et al</i> , 2014     | X   |                  |     |                            |           |           |             |                   | X           |                   |         |              | (60)    |
| Obi <i>et al</i> , 2016           | X   |                  | X   | X                          | X         |           | X           | X                 | X           | X                 |         |              | (48)    |
| Manson <i>et al</i> , 2018        |     |                  |     |                            |           |           |             |                   |             |                   |         |              | (38)    |
| Godina <i>et al</i> , 2020        | X   |                  | X   | X                          | X         |           |             |                   |             |                   |         |              | (8)     |
| Alonso-Molero <i>et al</i> , 2022 |     | X                | X   |                            | X         |           |             |                   |             | X                 | X       |              | (58)    |

X, adjustment variables employed in multivariate analysis.

Table SII. Results from the present meta-analysis excluding the Women's Health Initiative study.

| Subgroup                         | Number of | Number of | exp(ES) (95% CI) | I <sup>2</sup> (%) |
|----------------------------------|-----------|-----------|------------------|--------------------|
| HRT duration                     |           |           |                  |                    |
| <5 years                         | 9         | 774,539   | 0.78 (0.28-1.80) | 3.57               |
| 5-10 years                       | 9         | 774,539   | 0.82 (0.69-0.99) | 49.55              |
| >10 years                        | 2         | 702,373   | 1.31 (0.92-1.86) | 52.39              |
| HRT use at the time of diagnosis |           |           |                  |                    |
| Current                          | 14        | 1,545,188 | 0.82 (0.70-0.96) | 63.70              |
| Past                             | 10        | 1,538,576 | 1.00 (0.88-1.13) | 39.61              |

exp(ES), exponentiated effect size (expressed as odds ratio); HRT, hormone replacement therapy.
